# Supplementary material
Source: PubMed Central journal article supplement (PMC5653320)
Supplement: NIHMS911357-supplement-Sup_Fig_1.pdf [file NIHMS911357-supplement-Sup_Fig_1.pdf]

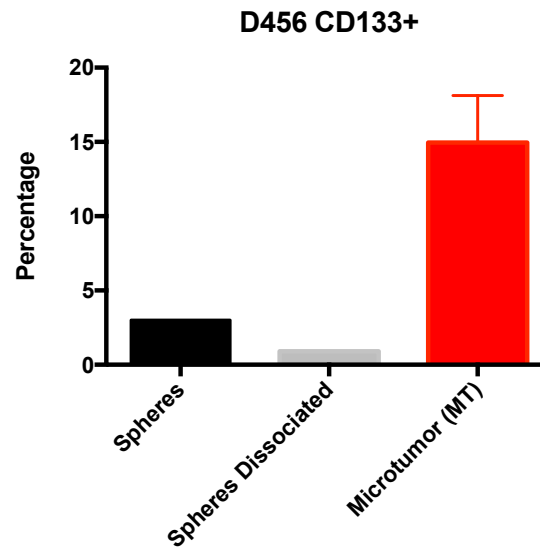

**Supplemental Figure 1. CD133 Percentages in the Microtumor Model.** Propagation of GBM cells as HuBiogel™ microtumors in physiologic microenvironments increased the percentage of cells expressing the BTIC marker CD133 in comparison to neurospheres. Neurospheres were dissociated similarly as the microtumors with Miltenyi dissociation kits or by pipetting only.
